# Supplementary material for: Direct re-lithiation strategy for spent lithium iron phosphate battery in Li-based eutectic using organic reducing agents
Source: Royal Society of Chemistry journal article supplement (doi:10.1039/d3su00237c), 2023-01-01
Supplement: d3su00237c1.pdf [file d3su00237c1.pdf]

## Direct re-lithiation strategy for spent lithium iron phosphate battery in Li-based eutectic using organic reducing agents

Tanongsak Yingnakorn,<sup>1</sup> Jennifer Hartley,<sup>1</sup> Jason S. Terreblanche,<sup>1</sup> Chunhong Lei,<sup>1</sup> Wesley Dose,<sup>1,2</sup> Andrew P Abbott\*<sup>1</sup>

<sup>1</sup> School of Chemistry, University of Leicester, Leicester, LE1 7RH, United Kingdom

<sup>2</sup> School of Chemistry, University of New South Wales, Sydney NSW 2052 Australia

\*apa1@le.ac.uk

### Supplementary Information

**Table S1** Starting materials and processes for the synthesis of LiFePO<sub>4</sub>.

| Li Source                        | P Source                                                              | Fe Source                                                          | Calcination Conditions              | Contributor                              |
|----------------------------------|-----------------------------------------------------------------------|--------------------------------------------------------------------|-------------------------------------|------------------------------------------|
| Li <sub>2</sub> CO <sub>3</sub>  | (NH <sub>4</sub> ) <sub>2</sub> HPO <sub>4</sub>                      | Fe <sub>3</sub> (PO <sub>4</sub> ) <sub>2</sub> ·8H <sub>2</sub> O | 800°C for 48 hr in N <sub>2</sub>   | MIT (1967) <sup>1</sup>                  |
| Li <sub>2</sub> CO <sub>3</sub>  | (NH <sub>4</sub> ) <sub>2</sub> HPO <sub>4</sub>                      | Fe(CH <sub>3</sub> CO <sub>2</sub> ) <sub>2</sub>                  | 800°C for 24 hr in Ar               | Goodenough (1997) <sup>2</sup>           |
| Li <sub>2</sub> CO <sub>3</sub>  | (NH <sub>4</sub> ) <sub>2</sub> HPO <sub>4</sub>                      | FeC <sub>2</sub> O <sub>4</sub> ·2H <sub>2</sub> O                 | 800°C for 36 hr in N <sub>2</sub>   | Sweden (2000) <sup>3</sup>               |
| Li <sub>3</sub> PO <sub>4</sub>  | Fe <sub>3</sub> (PO <sub>4</sub> ) <sub>2</sub> ·8H <sub>2</sub> O    |                                                                    | 700°C for 7 hr in Ar                | Sweden (2003) <sup>3</sup>               |
| LiNO <sub>3</sub>                | (NH <sub>4</sub> ) <sub>2</sub> HPO <sub>4</sub>                      | Fe <sub>3</sub> (NO <sub>3</sub> ) <sub>3</sub> ·9H <sub>2</sub> O | 750°C for 12 hr in Ar               | Komaba (2004) <sup>3</sup>               |
| LiCl                             | H <sub>3</sub> PO <sub>4</sub>                                        | FeCl <sub>2</sub> ·4H <sub>2</sub> O                               | 700°C for 12 hr in N <sub>2</sub>   | Nazar (2001) <sup>3</sup>                |
| Li <sub>2</sub> CO <sub>3</sub>  | NH <sub>4</sub> H <sub>2</sub> PO <sub>4</sub>                        | Fe(CH <sub>3</sub> CO <sub>2</sub> ) <sub>2</sub>                  | 550°C for 24 hr in N <sub>2</sub>   | Sony (2001) <sup>4</sup>                 |
| Li <sub>2</sub> CO <sub>3</sub>  | Fe[(C <sub>6</sub> H <sub>5</sub> PO <sub>3</sub> ·H <sub>2</sub> O)] |                                                                    | >600°C for >16 hr in N <sub>2</sub> | Italy (2004) <sup>3</sup>                |
| Li <sub>2</sub> CO <sub>3</sub>  | NH <sub>4</sub> H <sub>2</sub> PO <sub>4</sub>                        | FeC <sub>2</sub> O <sub>4</sub> ·2H <sub>2</sub> O                 | 600°C - 800°C in Ar                 | MIT and A123 Systems (2002) <sup>5</sup> |
| LiH <sub>2</sub> PO <sub>4</sub> |                                                                       | Fe <sub>2</sub> O <sub>3</sub>                                     | 750°C for 8 hr                      | Valance (2003) <sup>3</sup>              |

|                                                      |                 |                            |                         |                                 |
|------------------------------------------------------|-----------------|----------------------------|-------------------------|---------------------------------|
|                                                      |                 |                            | in Ar                   |                                 |
| $\text{Li}_3\text{PO}_4 \cdot 0.5\text{H}_2\text{O}$ | $\text{FePO}_4$ | $\text{FePO}_4, \text{Fe}$ | 600°C for 30 min. in Ar | SJTU and Ma (2004) <sup>6</sup> |

### Disassembly and confirmation of the active material and binder

The spent lithium iron phosphate battery was dismantled, and the electrodes were washed in dimethyl carbonate (DMC) for 24 hours. The dismantled materials consist of  $\text{LiFePO}_4$ -on-aluminium cathodes, graphite-on-copper anodes, and a pouch case. The cathode electrode was used as the raw material for this experiment. The total average thickness of the intact cathode is  $199.20 (\pm 2.43) \mu\text{m}$ , as determined via SEM imaging of the electrode cross-section, as shown in **Figure S1a**. This consists of three layers, an aluminium foil current collector ( $29.59 (\pm 1.65) \mu\text{m}$  thick) sandwiched between two layers of active cathode material ( $80.85 (\pm 1.25) \mu\text{m}$  and  $88.76 (\pm 2.47) \mu\text{m}$ ). At the electrode surface, the particle sizes are inhomogeneous, with a dimension range of about 200 nm to 1  $\mu\text{m}$  (**Figure S1b**). EDX analysis confirmed the Fe:P:O atomic ratio in the cathode active material to be 1: 1.02(0.02): 4.04(0.11) (see the **Table S2**), as would be expected for either  $\text{FePO}_4$  or  $\text{LiFePO}_4$ . The X-ray diffraction peaks of the initially spent  $\text{LiFePO}_4$  cathode plate, water-delaminated, and ground cathode powder are shown in **Figure S2**, and compared to standard  $\text{LiFePO}_4$  (COD 4001848) and standard  $\text{FePO}_4$  (COD 1525576). All three samples were confirmed to be the  $\text{LiFePO}_4$  olivine structure, but were observed to also contain a small amount of  $\text{FePO}_4$ .

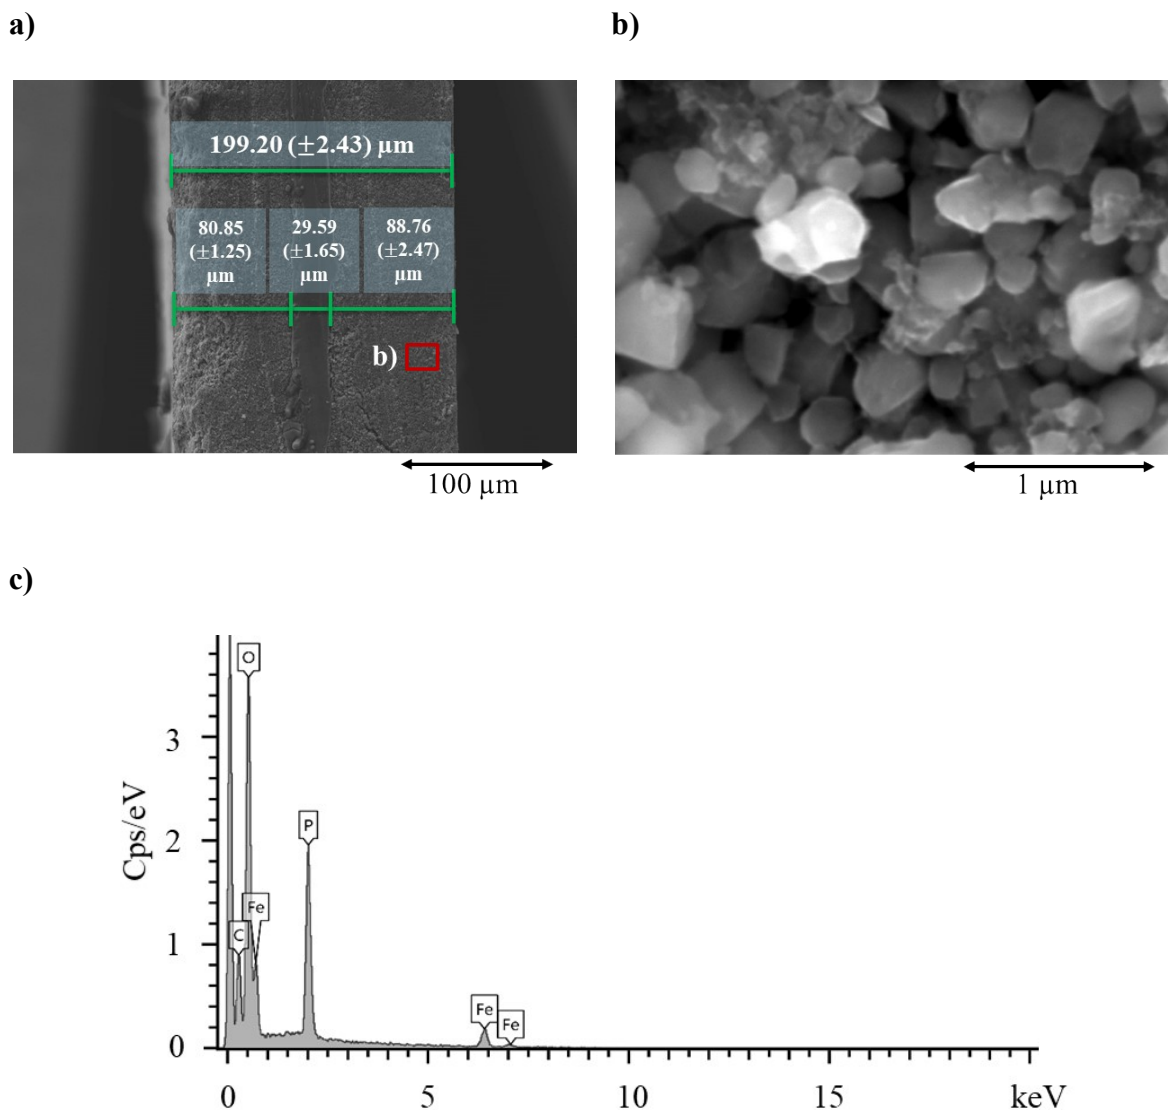

**Figure S1:** SEM image of a) the  $\text{LiFePO}_4$  cathode cross-session, b), and c) image and the EDX spectrum of the cathode area (highlight red areas).

**Table S2** EDX elemental composition of initial cathode (Figure S1b)

| Element | Wt%         | Atomic%     | Atomic ratio |
|---------|-------------|-------------|--------------|
| C       | 18.23(3.94) | 31.64(5.95) | 2.83(0.60)   |
| O       | 34.77(2.09) | 45.59(4.24) | 4.04(0.11)   |
| P       | 16.96(0.88) | 11.48(0.97) | 1.02(0.02)   |
| Fe      | 30.05(0.98) | 11.28(0.74) | 1.00(0.00)   |

Atomic ratio is calculated refer to Fe

Thermal analysis curves were measured for the spent  $\text{LiFePO}_4$  cathode and were compared with reference materials prepared from uncycled  $\text{LiFePO}_4$  with either CMC/SBR or with PVDF (90:5:5 weight ratio of  $\text{LiFePO}_4$ , carbon black, and binder, respectively). These binders were selected as they are the most common commercially used binders<sup>7-9</sup>, and it can be detected by weight loss, while  $\text{LiFePO}_4$  itself will not show significant mass change below the temperature of  $430\text{ }^\circ\text{C}$ <sup>10</sup>. It can be seen from **Figure S2a** that the most likely binder in the  $\text{LiFePO}_4$  cathode sample is CMC/SBR, even though there is a difference in the weight loss. This may be due to a difference in weight ratio of binder-to-active material in the two samples, as CMC/SBR is water-miscible and has a high probability of being leached from the active material during the water delamination step.

This identification is confirmed via the TGA and DTG results in **Figure S2b**, where it can be seen that there are three main mass loss processes. The first takes place from  $25\text{-}180\text{ }^\circ\text{C}$  (ca. 0.69 % mass loss), which probably results from the evaporation of moisture in the cathode. The second takes place from ca.  $180\text{-}330\text{ }^\circ\text{C}$  (ca. 1.5%), and the third takes place at  $330\text{-}490\text{ }^\circ\text{C}$  (ca. 1.15% mass loss). The DSC curve indicates a change in heat flow consumed in the sample within the first region ( $25\text{-}180\text{ }^\circ\text{C}$ ), agreeing with the suggestion of moisture evaporation, but does not have noticeable peaks of heat flow release for the other mass loss processes indicated by TGA. Additionally, at a temperature range of  $460\text{-}480\text{ }^\circ\text{C}$ , there is an exothermic peak that is not immediately identifiable as belonging to a mass loss process but it might relate with the thermal decomposition of the carbonaceous coating and carbon remaining from mixing slurry<sup>11, 12</sup>.

**Figure S2c** and **S2d** are the TGA and DTG curves comparing spent  $\text{LiFePO}_4$  cathode, CMC-SBR mixture, pure CMC, and PVDF binders. It is clear that the CMC curve shows two central changing regions (ca.  $25\text{-}180\text{ }^\circ\text{C}$  and  $180\text{-}330\text{ }^\circ\text{C}$ ) of weight loss, the CMC-SBR shows three central changing regions (ca.  $25\text{-}180\text{ }^\circ\text{C}$ ,  $180\text{-}330\text{ }^\circ\text{C}$ , and  $330\text{-}490\text{ }^\circ\text{C}$ ), while PVDF shows only one significant changing region (ca.  $350\text{-}500\text{ }^\circ\text{C}$ ). Therefore, it can be concluded that the CMC-SBR is correspondingly matched with the binder used in the spent  $\text{LiFePO}_4$  cathode in this current study. The presence of CMC/SBR is beneficial due to its water-miscibility, as all the active material could be in contact with the oxidising and re-lithiation solvents. If PVDF was present, it could potentially result in active material not reacting due to being encapsulated.

a)

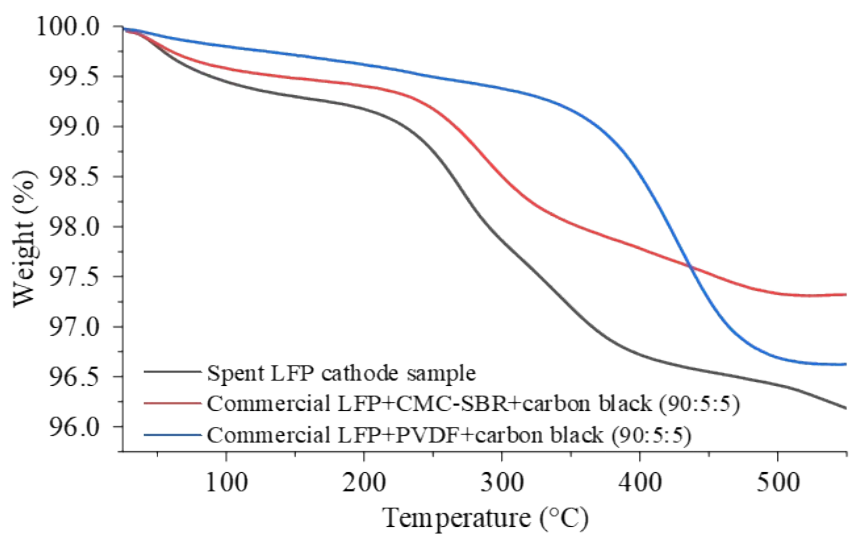

b)

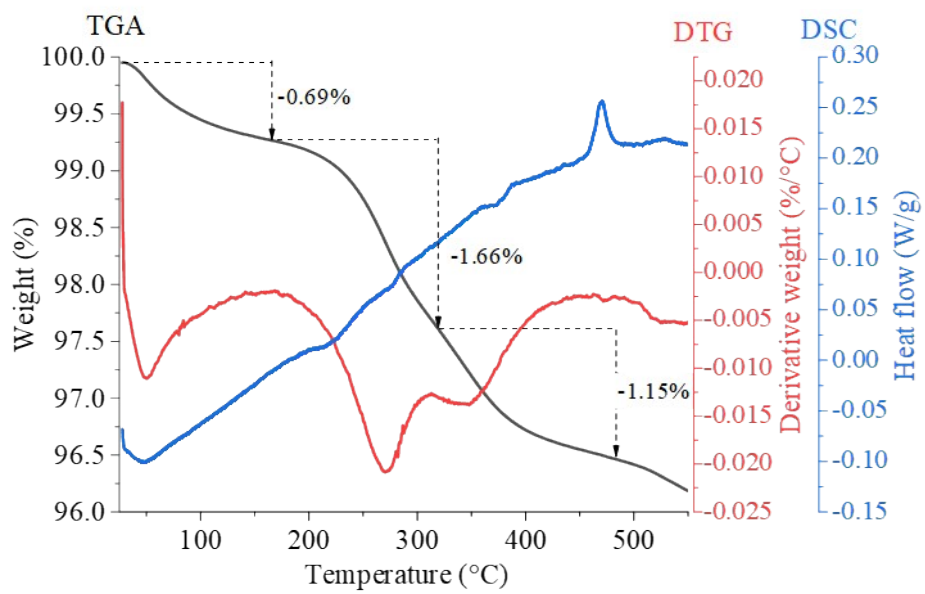

c)

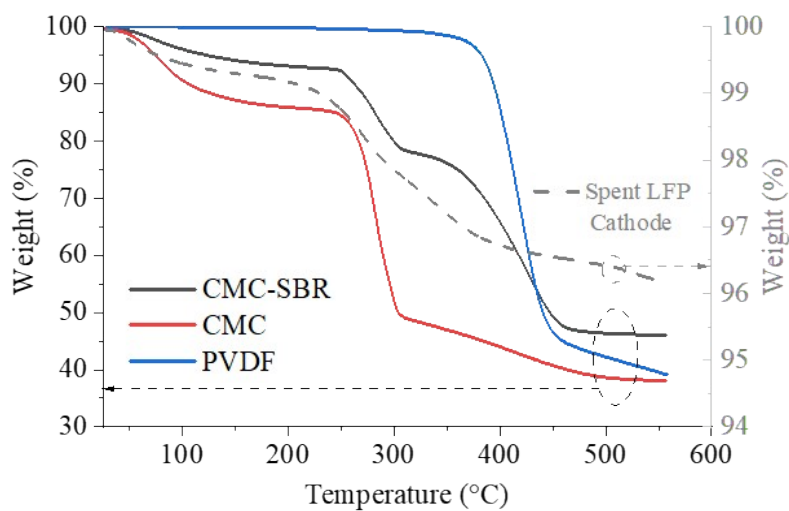

d)

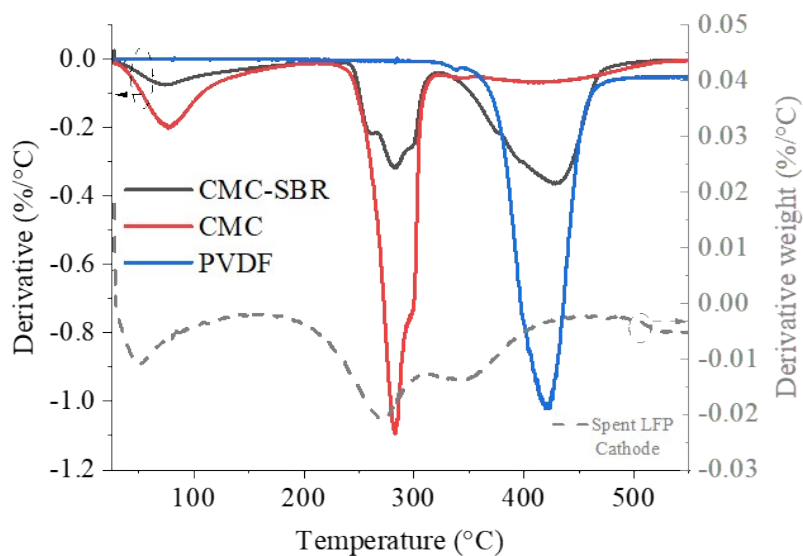

**Figure S2:** Thermal analysis of: a) Comparison of TGA curves of spent  $\text{LiFePO}_4$  cathode sample (black), mixed commercial  $\text{LiFePO}_4$  with carbon black and CMC-SBR at a weight ratio of 90:5:5 in water and coated on aluminium foil (red), and mixed commercial  $\text{LiFePO}_4$  with carbon black and PVDF at a weight ratio of 90:5:5 in NMP and coated on aluminium foil (blue), while b) spent  $\text{LiFePO}_4$  cathode, including TGA (black), DTG (red), and DSC (blue) graphs, and c) and d) are the TGA and DTG curves, respectively, of CMC-SBR mixture, pure CMC, and PVDF binders

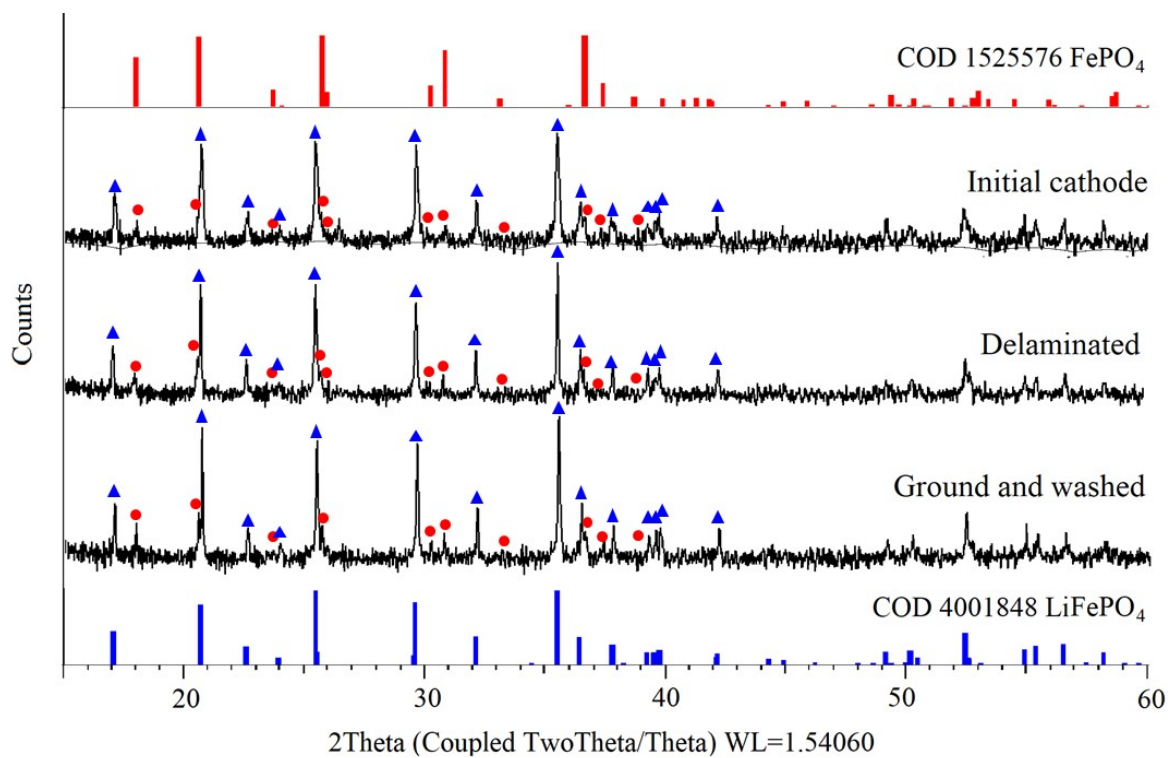

**Figure S3:** XRD patterns of the initial cathode, dried delaminated, and ground materials.

## Screening of organic reducing agents

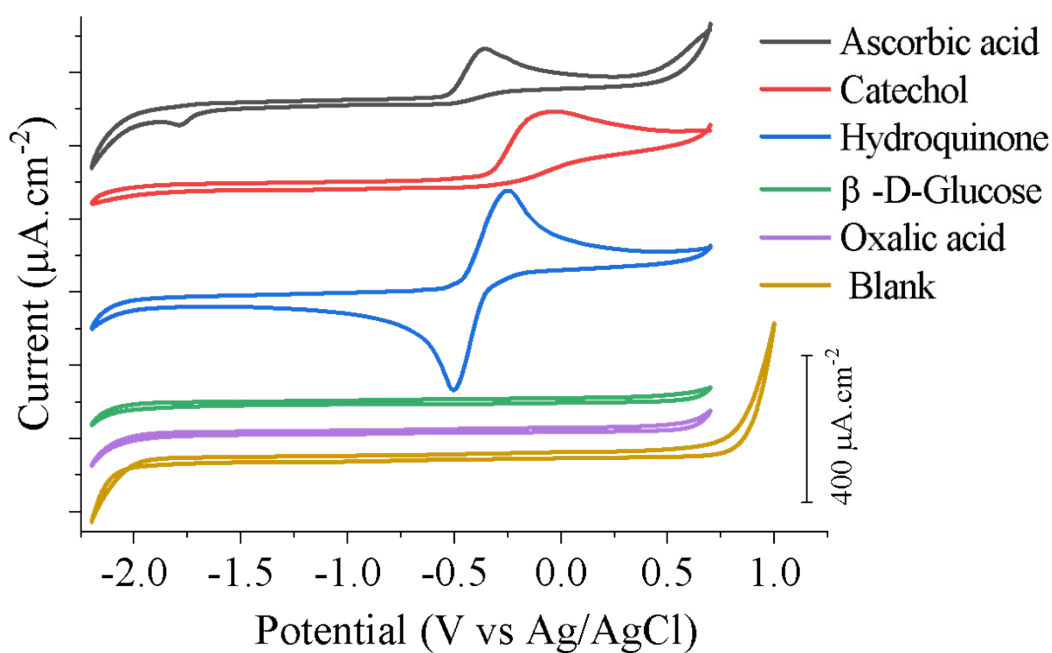

**Figure S4:** Cyclic voltammograms of 20 mmol dm<sup>-3</sup> of different catalysts in LiOAc·2H<sub>2</sub>O: 3EG solution. Scans are recorded at 25 °C at a scan rate of 20 mV s<sup>-1</sup>, using a graphite disk working electrode, and an aqueous 3.0 mol dm<sup>-3</sup> KCl silver/silver chloride reference electrode.

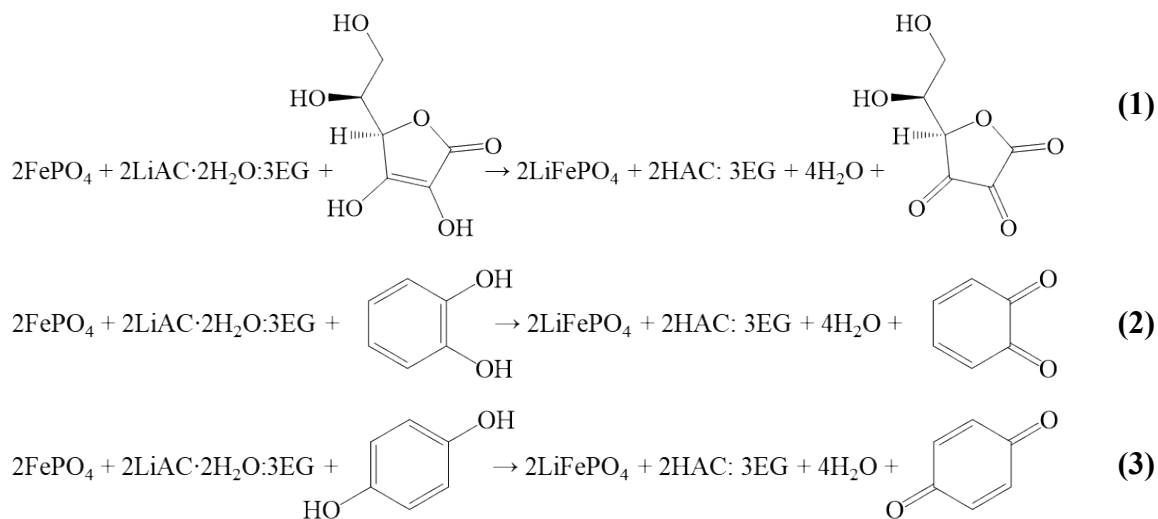



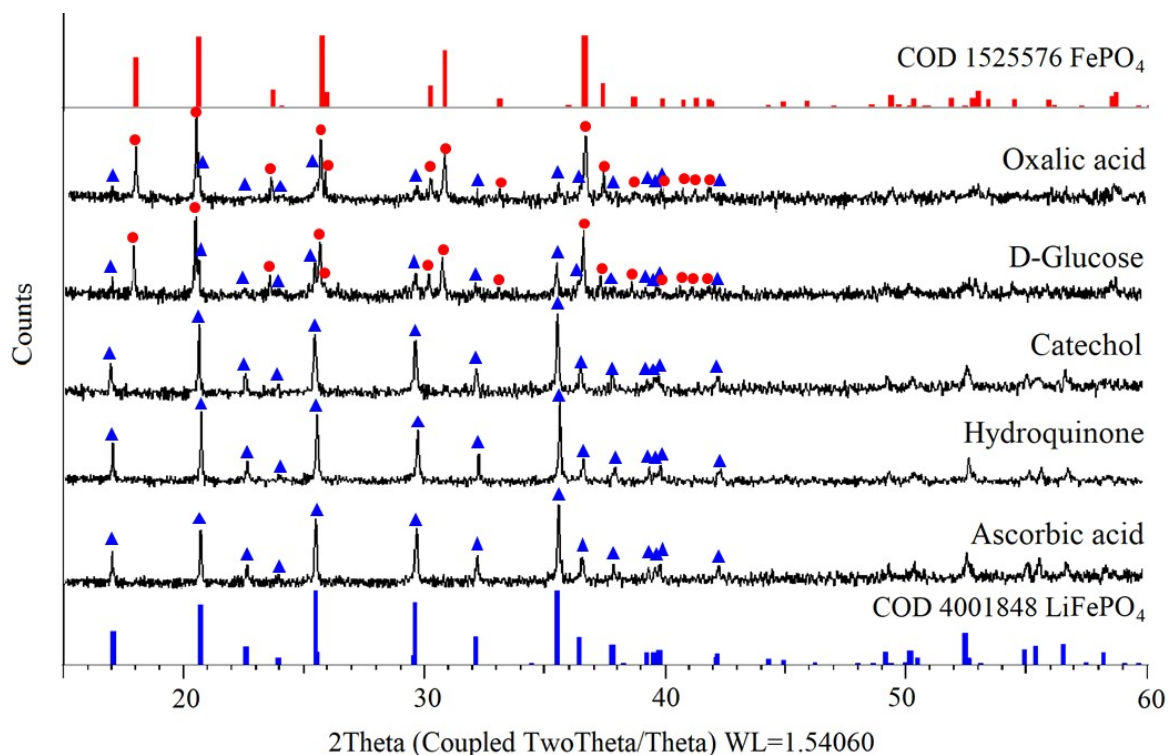

**Figure S5:** XRD patterns of the re-lithiated material using different organic oxidising agents in LiOAc·2H<sub>2</sub>O: 3EG solution at 50 °C for 5 h, included are reference patterns for FePO<sub>4</sub> and LiFePO<sub>4</sub> (initial material was the FePO<sub>4</sub> powder obtained after oxidative leaching).

## Direct reductive re-lithiation

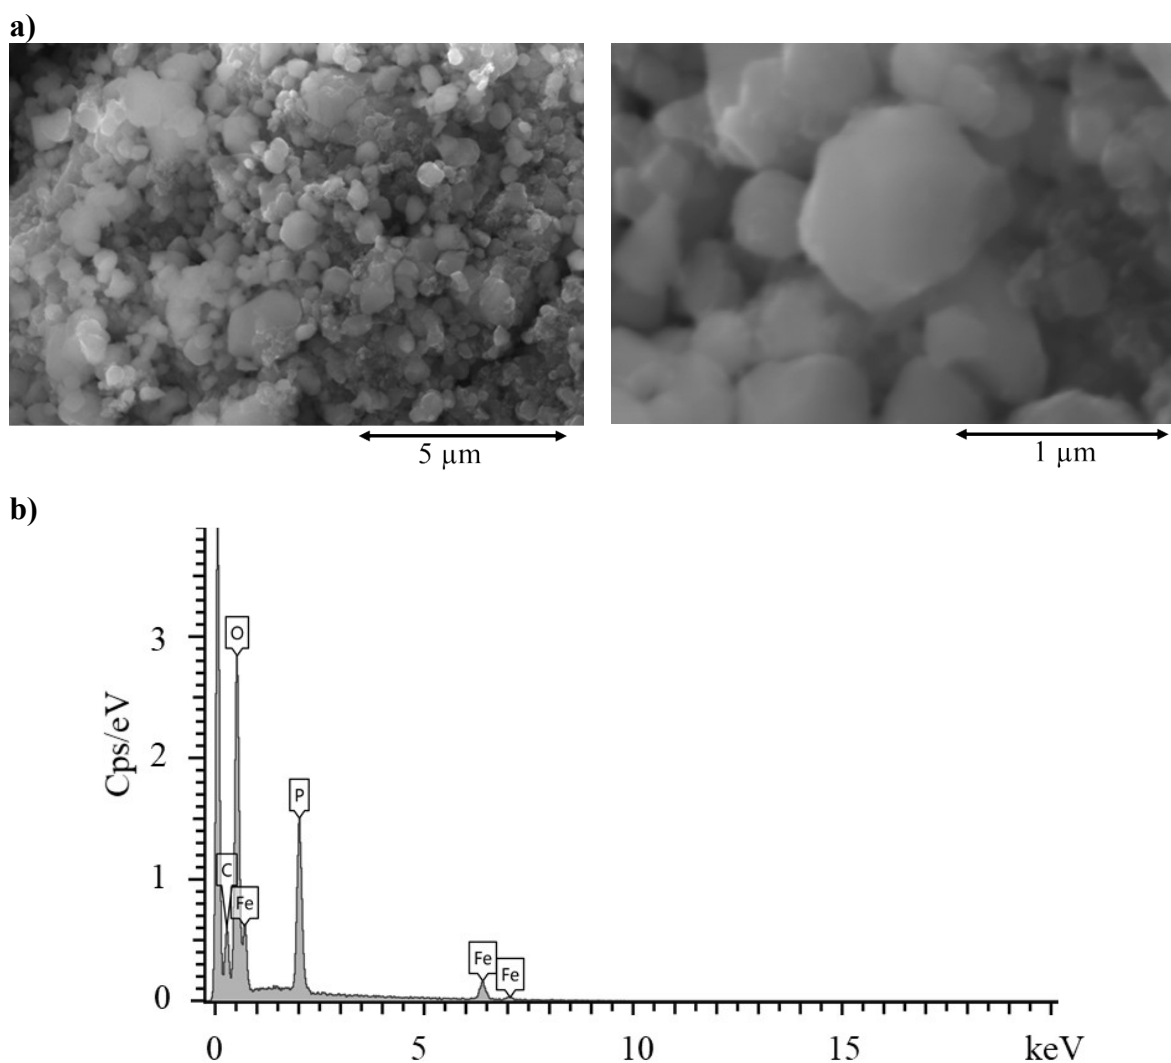

**Figure S6:** SEM images (a and b), EDX spectra (c) directly reductive regenerated  $\text{LiFePO}_4$  with  $1.74 \text{ mol dm}^{-3}$  hydroquinone in  $\text{LiOAc} \cdot 2\text{H}_2\text{O} : 3\text{EG}$  at  $25 \text{ }^\circ\text{C}$  for 1 hr

**Table S3** EDX elemental composition of directly reductive regenerated  $\text{LiFePO}_4$  with  $1.74 \text{ mol dm}^{-3}$  hydroquinone in  $\text{LiOAc} \cdot 2\text{H}_2\text{O} : 3\text{EG}$  at  $25 \text{ }^\circ\text{C}$  for 1 hr

| Element | Wt%         | Atomic%     | Atomic ratio |
|---------|-------------|-------------|--------------|
| C       | 14.88(1.99) | 26.31(3.72) | 2.37(0.61)   |
| O       | 38.56(7.46) | 50.80(7.13) | 4.71(1.68)   |
| P       | 16.45(1.60) | 11.33(1.81) | 1.00(0.11)   |
| Fe      | 30.00(6.03) | 11.51(3.08) | 1.00(0.00)   |

Atomic ratio is calculated refer to Fe.

## Oxidative leaching and reductive re-lithiation

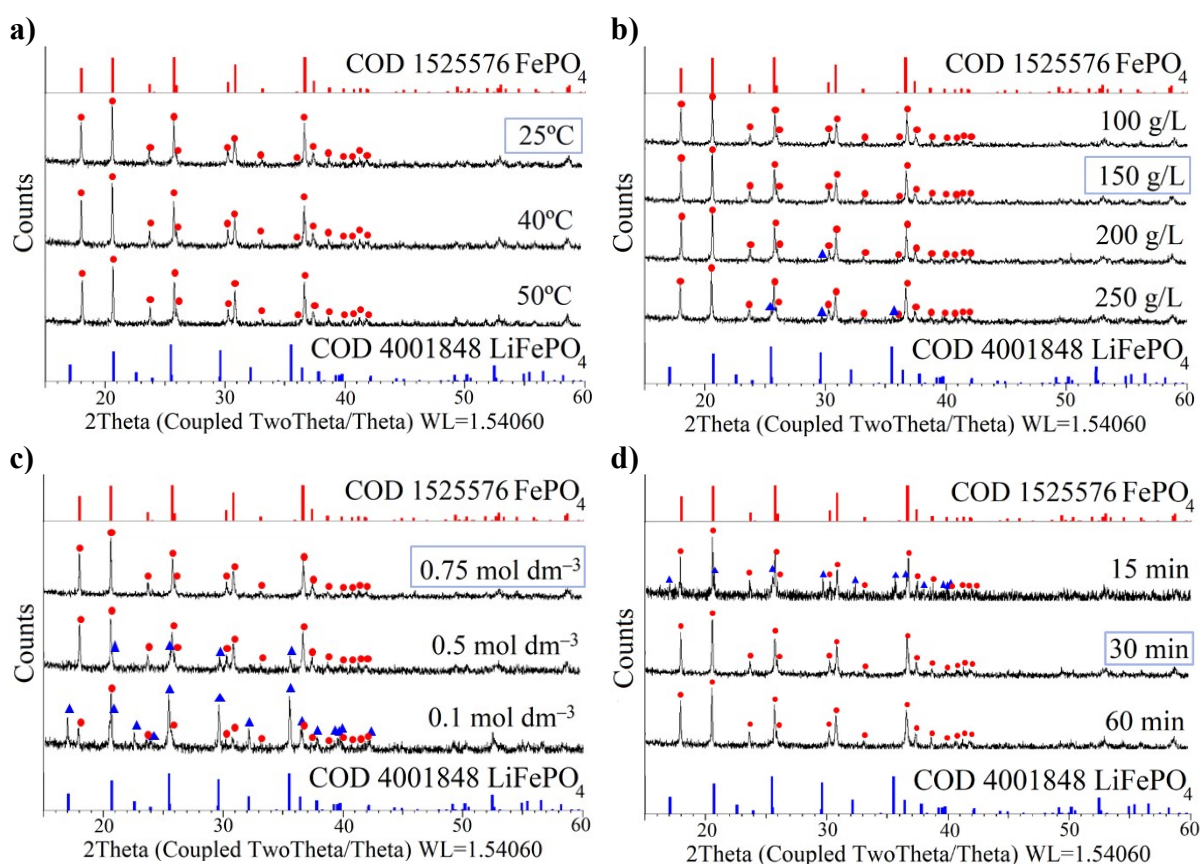

**Figure S7:** The effects of (a) temperature (under the conditions of 1 mol  $\text{dm}^{-3}$   $\text{FeCl}_3$  in water for 3 h 50 g  $\text{L}^{-1}$ ), (b) S/L ratio (under the conditions of 1 mol  $\text{dm}^{-3}$   $\text{FeCl}_3$  in water for 3 h 25 °C), (c) concentration of  $\text{FeCl}_3$  in water (under the conditions of 3 h, 150 g  $\text{L}^{-1}$  and 25 °C), and (d) time (under the conditions of 0.75 mol  $\text{dm}^{-3}$  in water and 150 g  $\text{L}^{-1}$  25 °C) on XRD patterns of oxidative leaching process.

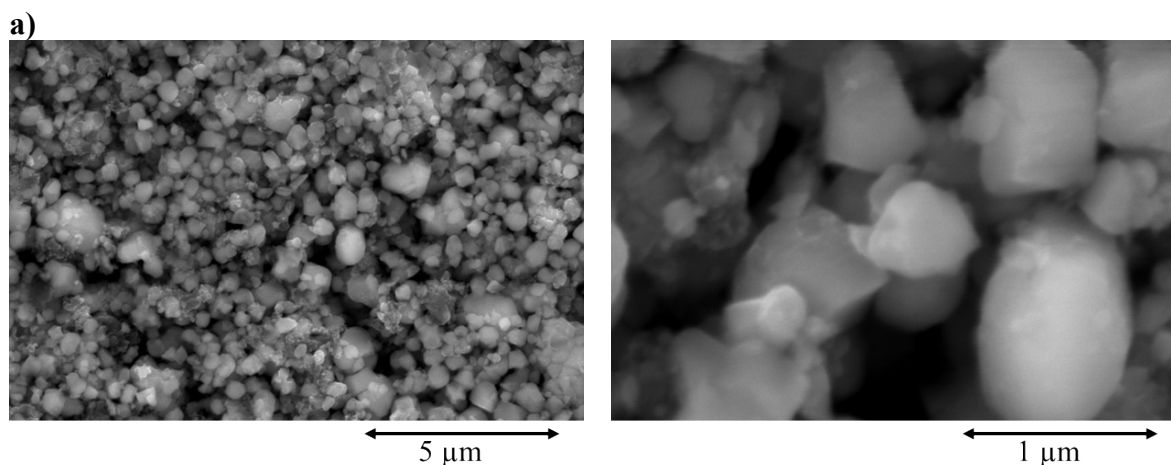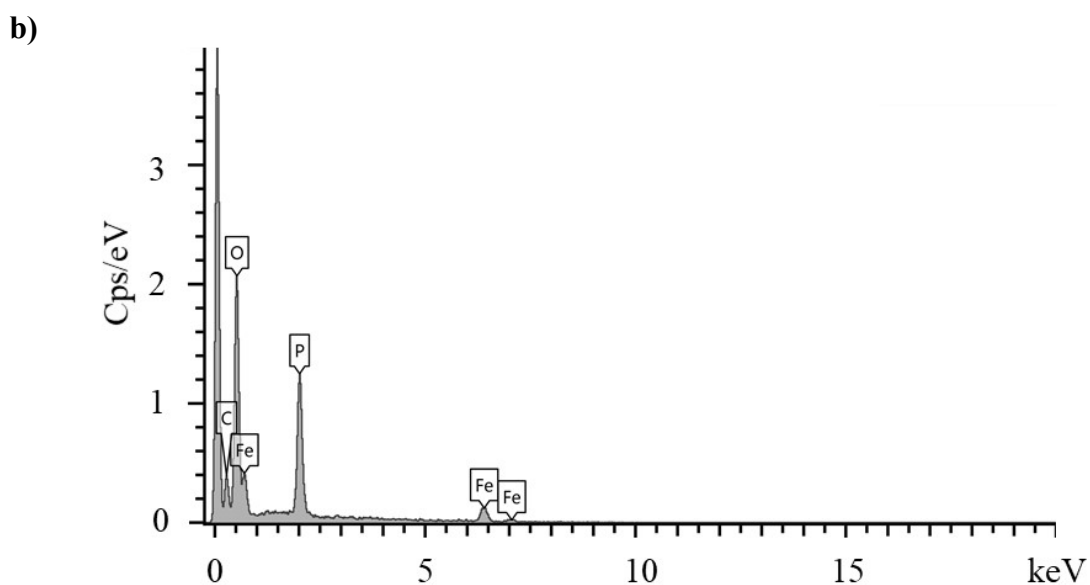

**Figure S8:** SEM images (a and b), EDX spectra (c) of oxidative leached, followed by reductive regenerated  $\text{LiFePO}_4$  with  $1.74 \text{ mol dm}^{-3}$  hydroquinone in  $\text{LiOAc} \cdot 2\text{H}_2\text{O} : 3\text{EG}$  at  $25 \text{ }^\circ\text{C}$  for 3 h.

**Table S4** EDX elemental composition of oxidative leached, followed by reductive regenerated  $\text{LiFePO}_4$  with  $1.74 \text{ mol dm}^{-3}$  hydroquinone in  $\text{LiOAc} \cdot 2\text{H}_2\text{O} : 3\text{EG}$  at  $25 \text{ }^\circ\text{C}$  for 3 h.

| Element | Wt%         | Atomic%     | Atomic ratio |
|---------|-------------|-------------|--------------|
| C       | 16.03(1.67) | 26.69(1.64) | 3.03(0.78)   |
| O       | 43.46(5.42) | 54.25(3.86) | 6.20(1.72)   |
| P       | 15.18(1.94) | 9.88(1.90)  | 1.09(0.06)   |
| Fe      | 25.34(4.73) | 9.17(2.31)  | 1.00(0.00)   |

Atomic ratio is calculated refer to Fe.

**Table S5** Detected elements in solutions (ppm) after oxidative leaching and reductive regenerated  $\text{LiFePO}_4$  from  $\text{FePO}_4$ , analysed by ICP-MS

| Element   | Leached solution (ppm) | Re-lithiated solution (ppm) |
|-----------|------------------------|-----------------------------|
| <b>Li</b> | 3941.79                | N/A                         |
| <b>P</b>  | 287.25                 | 355.46                      |
| <b>Fe</b> | N/A                    | 1223.03                     |

**Table S6** atomic percentage of spent LFP, powder after direct re-lithiation, powder after oxidative leaching and re-lithiated of leached powder (results calculated from ICP-MS).

| Element     | Spent LFP (atomic %) | Direct re-lithiated (atomic %) | Leached powder (atomic %) | Re-lithiated leached powder (atomic %) |
|-------------|----------------------|--------------------------------|---------------------------|----------------------------------------|
| <b>7Li</b>  | 0.91                 | 1.00                           | 0.02                      | 0.61                                   |
| <b>57Fe</b> | 1.00                 | 1.00                           | 1.00                      | 1.00                                   |
| <b>31P</b>  | 0.99                 | 1.02                           | 0.97                      | 1.01                                   |

$^{57}\text{Fe}$  is selected from Collision Mode (Kinetic Energy Discrimination, KED). Mole ratio is calculated refer to Fe. The isotopes are selected from gives the closest match ( $R$ -squared,  $R^2$  closest to 1) to of the calibration curves.

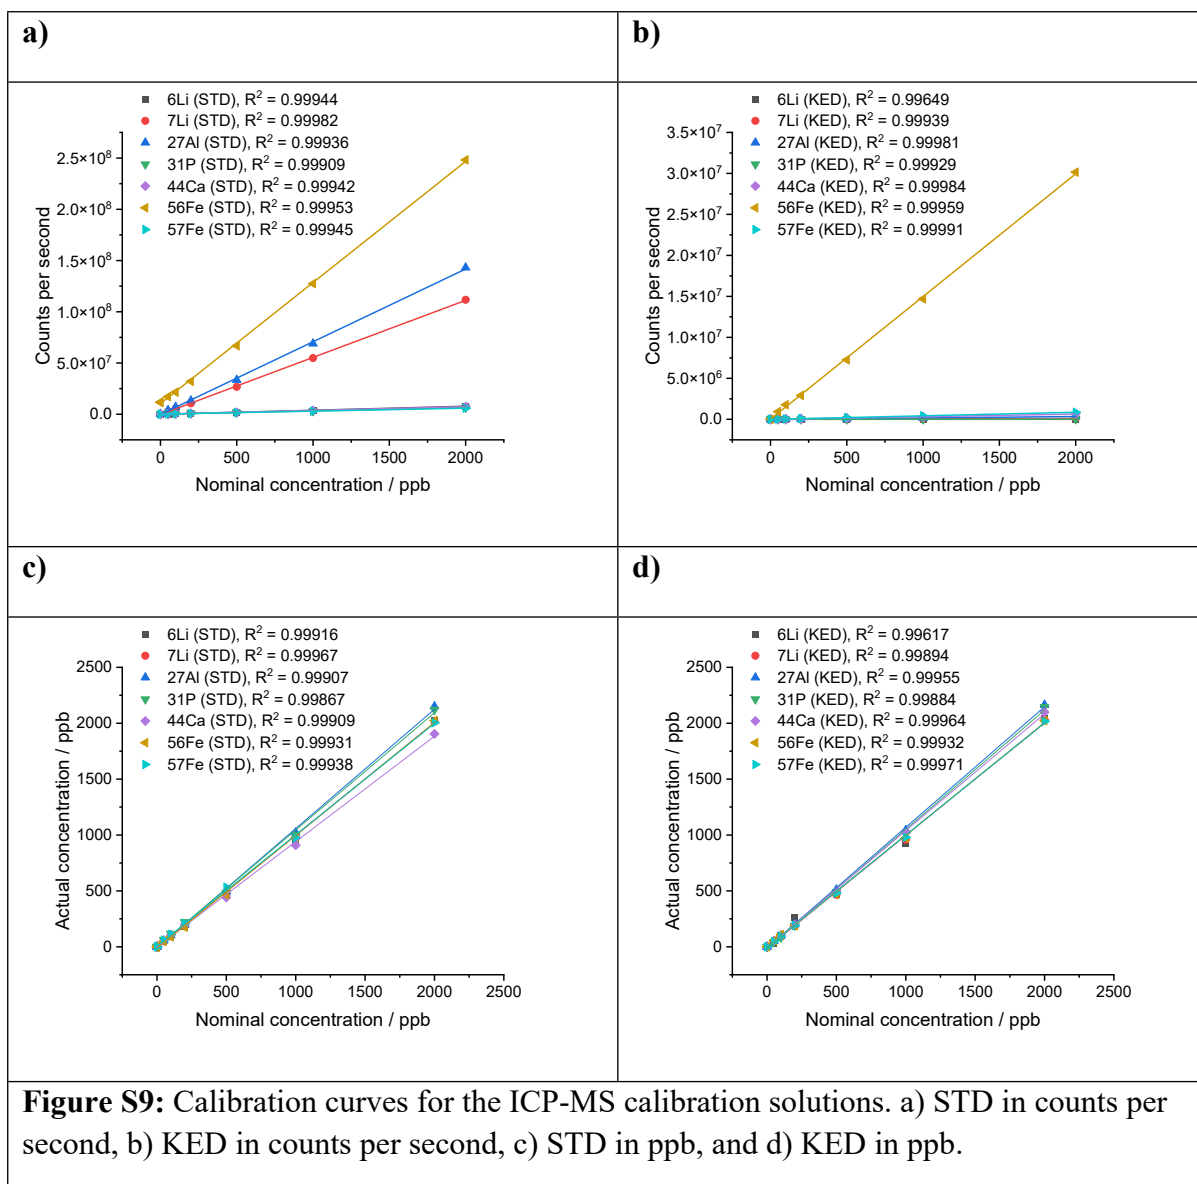

**Figure S9:** Calibration curves for the ICP-MS calibration solutions. a) STD in counts per second, b) KED in counts per second, c) STD in ppb, and d) KED in ppb.

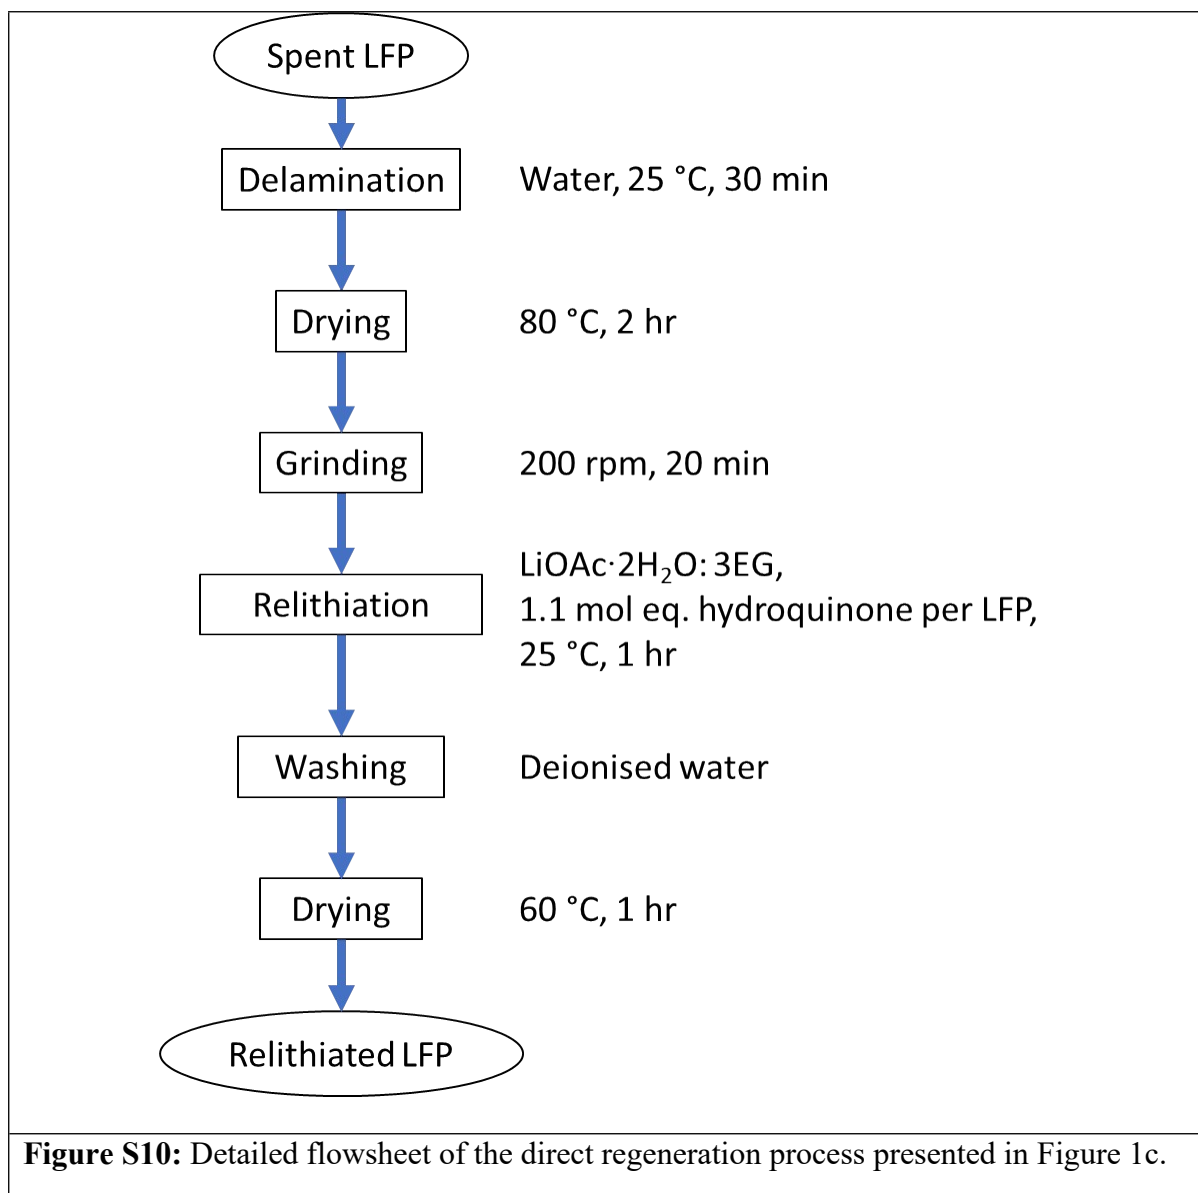

## References

1. R. P. Santoro and R. E. Newnham, *Acta Crystallographica*, 1967, **22**, 344-347.
2. A. K. Padhi, K. S. Nanjundaswamy and J. B. Goodenough, *Journal of The Electrochemical Society*, 1997, **144**, 1188-1194.
3. J. Li and Z.-F. Ma, *Chem*, 2019, **5**, 3-6.
4. A. Yamada, S. C. Chung and K. Hinokuma, *Journal of The Electrochemical Society*, 2001, **148**, A224.
5. S.-Y. Chung, J. T. Bloking and Y.-M. Chiang, *Nature Materials*, 2002, **1**, 123-128.
6. X.-Z. Liao, Z.-F. Ma, L. Wang, X.-M. Zhang, Y. Jiang and Y.-S. He, *Electrochemical and Solid-State Letters*, 2004, **7**.
7. D. L. Thompson, J. M. Hartley, S. M. Lambert, M. Shiref, G. D. J. Harper, E. Kendrick, P. Anderson, K. S. Ryder, L. Gaines and A. P. Abbott, *Green Chemistry*, 2020, **22**, 7585-7603.

8. F. Forte, M. Pietrantonio, S. Pucciarmati, M. Puzone and D. Fontana, *Critical Reviews in Environmental Science and Technology*, 2021, **51**, 2232-2259.
9. D. Latini, M. Vaccari, M. Lagnoni, M. Orefice, F. Mathieux, J. Huisman, L. Tognotti and A. Bertei, *Journal of Power Sources*, 2022, **546**, 231979.
10. J. Ha, S.-K. Park, S.-H. Yu, A. Jin, B. Jang, S. Bong, I. Kim, Y.-E. Sung and Y. Piao, *Nanoscale*, 2013, **5**, 8647-8655.
11. F. Pignanelli, M. Romero, D. Mombrú, E. Téliz, V. Díaz, J. Castiglioni, F. Zinola, R. Faccio and Á. W. Mombrú, *Ionics*, 2019, **25**, 3593-3601.
12. Q. Li, Z. Zhou, S. Liu and X. Zhang, *Ionics*, 2016, **22**, 1027-1034.
