# Supplementary material for: Direct re-lithiation strategy for spent lithium iron phosphate battery in Li-based eutectic using organic reducing agents
Source: Royal Society of Chemistry journal article supplement (doi:10.1039/d3su00237c), 2023-01-01
Supplement: d3su00237c2.xlsx [file d3su00237c2.xlsx]

## Sheet: 13-03-23
				Sample 1	Sample 2	Sample 3	Sample 4	Sample 5	Sample 6	Sample 7	Sample 8	Sample 9	Sample 10	Sample 11	Sample 12	Sample 13	Sample 14	Sample 15	Sample 16	Sample 17	Sample 18	Sample 19	Sample 20	Sample 21	Sample 22	Sample 23	Sample 24
				Blank 1	Blank 2	Blank 3	2a + 4 50	2a + 4 100	2a + 4 200	2a + 4 500	2a + 4 1000	2a + 4 2000	wash 1	wash 2	wash 3	Commercial LFP (24.3 mg/25ml and diluted for 200 times)	Spent LFP (25.6 mg/25ml and diluted for 200 times)	After oxidative leaching (26.9 mg/25ml and diluted for 200 times)	Re-Li from the particle after leaching (26.4 mg/25ml and diluted for 200 times)	Direct Re-Li (25.3 mg/25ml and diluted for 200 times)	Initail solution of FeCl3 in water (1000 times dilution)	Solution after oxidative leaching (1000 times dilution)	Solution after Re-Li(from particle after oxidative leaching) (1000 times dilution)	Solution after direct Re-Li (1000 times dilution)	wash 1	wash 2	wash 3
Raw.Average	0	6Li (STD)	Y [cps]	93.3339	80.0007	106.668	187951	366764	714952	1.85621e+06	3.77149e+06	7.87142e+06	1006.71	520.013	420.01	782617	612171	13080.2	449649	648867	6141.53	1.5447e+07	4.3411e+07	7.18985e+07	4200.72	2006.84	1573.44
Raw.Average	0	6Li (KED)	Y [cps]	0	0	0	60.0003	166.668	413.341	740.023	1420.09	3100.4	0	0	0	320.005	213.336	6.66669	180.002	260.004	6.66669	5828.06	17298.7	29481.5	0	0	6.66669
Raw.Average	0	7Li (STD)	Y [cps]	1206.73	926.707	1166.72	2.6989e+06	5.28733e+06	1.0552e+07	2.67208e+07	5.48235e+07	1.11677e+08	12279.4	7068.7	5594.61	1.0612e+07	8.40117e+06	183085	6.09667e+06	8.86639e+06	68252.7	2.08737e+08	5.96276e+08	9.76278e+08	49210.3	21872.6	18013
Raw.Average	0	7Li (KED)	Y [cps]	0	20.0001	13.3334	2493.6	4907.65	9470.28	24083.3	48387	101451	26.6668	6.66669	13.3334	9116.68	7689.04	153.335	5307.82	8002.6	66.6673	180677	510353	836829	46.6669	33.3335	26.6668
Raw.Average	0	27Al (STD)	Y [cps]	279839	332000	330741	3.89732e+06	7.06194e+06	1.33209e+07	3.34257e+07	6.8918e+07	1.43105e+08	253050	311018	316857	232186	341662	211557	251248	326793	1.2526e+06	3.75307e+06	201147	158007	238671	288945	291719
Raw.Average	0	27Al (KED)	Y [cps]	666.688	653.353	786.696	9857.26	17659.2	33531.7	84921.2	168388	344788	540.013	680.02	640.018	493.346	713.356	366.673	493.345	846.698	2806.99	9163.38	446.676	300.006	506.678	720.023	726.691
Raw.Average	0	31P (STD)	Y [cps]	76862.7	75341.1	76246	259141	420196	739894	1.5553e+06	3.13631e+06	6.48313e+06	76929.9	77641	76547.9	2.662e+06	2.43558e+06	2.6376e+06	2.55633e+06	2.28254e+06	91984.6	976740	1.05249e+06	177932	90943.9	86304.3	89546.8
Raw.Average	0	31P (KED)	Y [cps]	153.335	126.668	126.668	660.021	1100.05	2233.55	5587.94	11138.3	23275.1	186.669	166.668	173.336	8969.92	8276.11	9283.48	9096.67	8109.32	206.669	3020.38	3733.9	413.341	200.002	240.003	273.337
Raw.Average	0	44Ca (STD)	Y [cps]	64747.9	57298	57438.7	269101	450056	820550	1.7904e+06	3.62304e+06	7.44229e+06	59856.5	51044.4	54498.9	59394.4	66959.1	62837.8	63199.6	61739.2	58403	96968.5	98769.7	82833.9	53528.1	47891.9	50388.4
Raw.Average	0	44Ca (KED)	Y [cps]	326.672	260.004	306.672	19254.9	35604.2	62342	158223	317026	644476	360.006	280.004	333.339	433.343	620.018	460.01	433.342	406.676	500.011	1040.05	420.009	320.005	486.679	326.673	300.006
Raw.Average	0	45Sc (STD)	Y [cps]	1.37901e+06	1.35841e+06	1.35413e+06	1.34416e+06	1.26517e+06	1.23622e+06	1.28845e+06	1.37215e+06	1.52419e+06	1.21737e+06	1.21171e+06	1.23436e+06	1.19121e+06	1.12888e+06	1.10012e+06	1.06839e+06	1.06601e+06	1.16609e+06	1.12085e+06	1.20547e+06	1.10252e+06	1.15341e+06	1.15327e+06	1.15257e+06
Raw.Average	0	45Sc (KED)	Y [cps]	41990.7	40913.8	41923.9	41214.6	40479	40311.7	45128.2	54016.7	72007	34621.4	35203	34307.2	34227	33658.7	31145.6	31346.1	31813.9	34059.7	33190.8	33972.9	30243.3	33364.6	32876.7	33204.2
Raw.Average	0	56Fe (STD)	Y [cps]	1.17875e+07	1.16414e+07	1.15531e+07	1.71116e+07	2.15524e+07	3.20252e+07	6.67891e+07	1.27337e+08	2.48204e+08	9.02166e+06	9.04506e+06	9.20345e+06	1.96461e+08	1.72421e+08	1.96611e+08	1.8589e+08	1.63627e+08	4.24865e+09	4.16291e+09	1.50534e+08	1.3328e+07	9.30066e+06	9.01253e+06	8.87748e+06
Raw.Average	0	56Fe (KED)	Y [cps]	8022.61	7715.77	6921.95	935368	1.77951e+06	2.90677e+06	7.25121e+06	1.46936e+07	3.01495e+07	7562.38	7969.4	6755.18	2.32021e+07	2.06167e+07	2.34704e+07	2.21321e+07	1.94616e+07	5.19067e+08	5.16649e+08	1.73345e+07	465402	52992.4	14822.2	12646.5
Raw.Average	0	57Fe (STD)	Y [cps]	55161.7	53628.4	54579.1	224500	371188	661795	1.62633e+06	2.91927e+06	5.89683e+06	48567.7	49350.7	48721.6	4.62034e+06	4.03264e+06	4.64292e+06	4.37889e+06	3.85282e+06	1.04534e+08	1.02463e+08	3.53339e+06	134339	58302.6	49986.6	49444.6
Raw.Average	0	57Fe (KED)	Y [cps]	180.002	173.335	180.002	23709.2	44546.1	85015.2	214377	426711	867861	273.338	186.669	153.335	669775	594900	677456	639119	557632	1.33272e+07	1.34366e+07	497771	12099.2	1306.74	400.008	320.006
Raw.Average	0	103Rh (KED)	Y [cps]	1.81162e+06	1.77692e+06	1.7748e+06	1.73391e+06	1.64676e+06	1.54972e+06	1.56045e+06	1.52346e+06	1.50515e+06	1.59011e+06	1.61238e+06	1.58116e+06	1.53948e+06	1.52529e+06	1.49237e+06	1.45086e+06	1.43846e+06	1.4696e+06	1.41565e+06	1.42316e+06	1.29659e+06	1.49221e+06	1.49226e+06	1.47606e+06
Raw.Average	0	103Rh (STD)	Y [cps]	2.10201e+06	2.20335e+06	2.28433e+06	2.1706e+06	2.16701e+06	2.18438e+06	2.22105e+06	2.22024e+06	2.19603e+06	2.27912e+06	2.2721e+06	2.28033e+06	2.23526e+06	2.16521e+06	2.14927e+06	2.0763e+06	2.08258e+06	2.21187e+06	2.10085e+06	2.08063e+06	1.90753e+06	2.11253e+06	2.18736e+06	2.18956e+06
Raw.Average	0	139La (STD)	Y [cps]	2.62396e+06	2.57292e+06	2.53517e+06	2.54141e+06	2.48987e+06	2.39554e+06	2.43196e+06	2.40808e+06	2.43694e+06	2.45559e+06	2.48678e+06	2.51488e+06	2.47191e+06	2.34721e+06	2.35862e+06	2.32219e+06	2.30361e+06	2.38092e+06	2.34954e+06	2.31715e+06	2.18792e+06	2.42944e+06	2.35698e+06	2.39863e+06
Raw.Average	0	139La (KED)	Y [cps]	1.58852e+06	1.56532e+06	1.55986e+06	1.53399e+06	1.46617e+06	1.40118e+06	1.39314e+06	1.37027e+06	1.335e+06	1.38693e+06	1.40675e+06	1.37877e+06	1.35614e+06	1.34888e+06	1.32573e+06	1.27807e+06	1.27037e+06	1.29039e+06	1.28486e+06	1.28655e+06	1.19988e+06	1.30327e+06	1.28379e+06	1.28808e+06
ExtCal.Average	0	6Li (STD)	Y [ppb]	0.0010189	-0.00350449	0.00248559	49.2316	96.24	185.151	472.78	961.051	2027.97	0.225868	0.105557	0.0801318	198.065	159.957	3.41891	122.504	176.275	1.54677	4160.29	11805.5	21323.3	1.10556	0.495621	0.383071
ExtCal.Average	0	6Li (KED)	Y [ppb]	0	0	0	34.2197	100.235	264.259	469.745	925.228	2038.91	0	0	0	205.868	138.209	4.39815	122.423	178.694	4.54949	4077.49	12037.3	22522.5	0	0	4.50754
ExtCal.Average	0	7Li (STD)	Y [ppb]	0.00284126	-0.0033054	0.000464137	49.6138	97.2576	191.58	477.167	979.425	2016.98	0.193771	0.103519	0.077386	188.287	153.92	3.35876	116.442	168.879	1.20411	3941.79	11368.1	20299.7	0.905814	0.376856	0.306377
ExtCal.Average	0	7Li (KED)	Y [ppb]	-0.188574	0.151724	0.0368503	43.1743	89.6549	184.143	465.16	957.768	2032.1	0.311874	-0.0625593	0.0639328	178.399	151.845	2.90482	110.081	167.558	1.17922	3848.47	10813.8	19461.5	0.755301	0.485915	0.354476
ExtCal.Average	0	27Al (STD)	Y [ppb]	-0.337043	0.256586	0.0804569	54.9734	103.627	196.943	493.001	1021.91	2150.59	-1.06894	-0.213505	-0.14493	-1.30546	0.478483	-1.48544	-0.739022	0.449219	13.9889	54.3559	-1.54347	-2.00165	-0.993819	-0.371337	-0.33348
ExtCal.Average	0	27Al (KED)	Y [ppb]	-0.235313	-0.242189	0.477502	50.0912	97.7669	201.094	511.334	1042.58	2164.71	-0.502119	0.274741	0.108345	-0.686888	0.700587	-1.39212	-0.503137	1.85449	14.3426	57.5354	-0.748433	-1.51995	-0.50349	0.84811	0.942173
ExtCal.Average	0	31P (STD)	Y [ppb]	1.30301	-0.392959	-0.910054	62.0727	116.422	220.974	483.846	1001.64	2121.23	-0.747537	-0.44181	-0.876779	840.578	792.743	866.913	869.885	771.627	4.95245	312.747	342.543	42.5342	6.09805	3.40156	4.45707
ExtCal.Average	0	31P (KED)	Y [ppb]	1.23526	-0.624566	-0.610691	42.4396	82.7184	190.458	489.054	1009.49	2145.99	5.76764	3.80152	4.6892	802.391	746.693	857.162	864.673	775.718	9.03336	287.248	355.464	33.8855	8.12369	11.8279	15.2638
ExtCal.Average	0	44Ca (STD)	Y [ppb]	1.92084	-0.748905	-1.17194	55.1972	102.851	197.275	441.137	908.904	1904.36	-0.658168	-2.80898	-1.99752	-0.482513	1.98343	1.02729	1.70818	1.26129	-0.576899	10.616	11.3623	9.06269	-1.13615	-3.13119	-2.49506
ExtCal.Average	0	44Ca (KED)	Y [ppb]	0.0687017	-0.100271	0.0315693	53.6503	105.203	196.486	496.48	1019.87	2099.32	0.292412	0.0341004	0.220175	0.562279	1.17463	0.695681	0.650842	0.571373	0.850273	2.78472	0.629437	0.392967	0.783161	0.257845	0.180259
ExtCal.Average	0	56Fe (STD)	Y [ppb]	5.14765	-0.625799	-4.52185	48.7968	87.755	175.217	464.735	977.247	2023.31	-25.8646	-25.438	-24.4015	1550.97	1395.93	1618.36	1581.8	1375.85	35989.1	37132.9	1259.02	31.1876	-17.2569	-22.814	-24.0507
ExtCal.Average	0	56Fe (KED)	Y [ppb]	0.0208318	0.0118993	-0.0327312	54.0314	108.66	188.922	468.662	973.16	2021.83	0.0534589	0.0726592	0.00508094	1521.1	1364.25	1587.19	1539.46	1365.35	35655.6	36844.7	1229.12	35.8075	3.15884	0.576571	0.438622
ExtCal.Average	0	57Fe (STD)	Y [ppb]	1.01367	-0.339546	-0.674123	59.6231	111.137	209.483	532.858	971.713	2004.18	-2.70762	-2.39781	-2.66668	1538.3	1384.24	1608.69	1570.05	1374.93	35586.1	36726.5	1260.5	34.2976	2.09887	-1.54161	-1.75365
ExtCal.Average	0	57Fe (KED)	Y [ppb]	-0.000658248	-0.00662408	0.00728233	47.4783	94.2853	191.556	480.178	979.387	2016.46	0.252974	0.0574602	-0.00855331	1521.53	1364.02	1587.39	1540.58	1355.59	31719.6	33200	1223.03	32.2893	2.71522	0.589612	0.408753
ExtCal.Average	0	103Rh (KED)	Y [%]	100	98.0845	97.9675	95.7105	90.8995	85.5429	86.1355	84.0936	83.0831	87.7728	89.0017	87.2787	84.9777	84.1945	82.3776	80.0863	79.4017	81.1204	78.1424	78.5573	71.5706	82.3686	82.3716	81.4774
ExtCal.Average	0	103Rh (STD)	Y [%]	100	104.821	108.673	103.263	103.092	103.919	105.663	105.625	104.473	108.426	108.092	108.483	106.339	103.007	102.248	98.7771	99.0757	105.226	99.9448	98.983	90.7479	100.501	104.061	104.165
ExtCal.Average	0	139La (STD)	Y [%]	100	98.0549	96.6164	96.8542	94.8898	91.2949	92.6829	91.7728	92.8726	93.5834	94.7721	95.8432	94.2054	89.453	89.8877	88.4996	87.7912	90.7378	89.5419	88.3075	83.3822	92.5868	89.8252	91.4126
ExtCal.Average	0	139La (KED)	Y [%]	100	98.5396	98.1961	96.5673	92.2982	88.2071	87.7009	86.261	84.0409	87.3096	88.5576	86.7959	85.3714	84.9144	83.4574	80.4571	79.9719	81.2324	80.8846	80.9905	75.5348	82.0432	80.8166	81.0873
															Mass%
ExtCal.LOD	0	6Li (STD)	Y [ppb]				0.00936696	0.00936696	0.00936696	0.00936696	0.00936696	0.00936696			Li	7.38391	6.66056	0.136676	4.61012	7.3239
ExtCal.LOD	0	6Li (KED)	Y [ppb]				0	0	0	0	0	0			Fe	59.6518	59.0352	64.5865	60.9498	59.2123
ExtCal.LOD	0	7Li (STD)	Y [ppb]				0.00929852	0.00929852	0.00929852	0.00929852	0.00929852	0.00929852			P	32.9643	34.3043	35.2768	34.4401	33.4638
ExtCal.LOD	0	7Li (KED)	Y [ppb]				0.519348	0.519348	0.519348	0.519348	0.519348	0.519348
ExtCal.LOD	0	27Al (STD)	Y [ppb]				0.914651	0.914651	0.914651	0.914651	0.914651	0.914651
ExtCal.LOD	0	27Al (KED)	Y [ppb]				1.24063	1.24063	1.24063	1.24063	1.24063	1.24063			Mole%
ExtCal.LOD	0	31P (STD)	Y [ppb]				3.47305	3.47305	3.47305	3.47305	3.47305	3.47305			Li	1.06381	0.959597	0.0196911	0.664187	1.05516
ExtCal.LOD	0	31P (KED)	Y [ppb]				3.20936	3.20936	3.20936	3.20936	3.20936	3.20936			Fe	1.06817	1.05713	1.15653	1.09141	1.0603
ExtCal.LOD	0	44Ca (STD)	Y [ppb]				5.03068	5.03068	5.03068	5.03068	5.03068	5.03068			P	1.06519	1.10848	1.13991	1.11287	1.08133
ExtCal.LOD	0	44Ca (KED)	Y [ppb]				0.266399	0.266399	0.266399	0.266399	0.266399	0.266399
ExtCal.LOD	0	56Fe (STD)	Y [ppb]				14.5951	14.5951	14.5951	14.5951	14.5951	14.5951		Mole ratio compare to Fe
ExtCal.LOD	0	56Fe (KED)	Y [ppb]				0.0860872	0.0860872	0.0860872	0.0860872	0.0860872	0.0860872			Li	0.995922	0.907741	0.017026	0.608559	0.995159
ExtCal.LOD	0	57Fe (STD)	Y [ppb]				2.68098	2.68098	2.68098	2.68098	2.68098	2.68098			Fe	1	1	1	1	1
ExtCal.LOD	0	57Fe (KED)	Y [ppb]				0.0209296	0.0209296	0.0209296	0.0209296	0.0209296	0.0209296			P	0.99721	1.04858	0.985628	1.01967	1.01983

## Sheet: 10-05-23 (repeat)
				Sample 1	Sample 2	Sample 3	Sample 4	Sample 5	Sample 6	Sample 7	Sample 8	Sample 9	Sample 10	Sample 11	Sample 12	Sample 13	Sample 14	Sample 15	Sample 16	Sample 17	Sample 18	Sample 19	Sample 20	Sample 21	Sample 22
				Blank 4	Blank 5	Blank 6	4 50	4 100	4 200	4 500	4 1000	4 2000	2a 50	2a 100	2a 200	2a 500	2a 1000	2a 2000	wash run 1	wash run 2	wash run 3	Spent LFP (20.6 mg/25ml and diluted for 200 times)	Direct Re-Li (29.6 mg/25ml and diluted for 200 times)	wash run 4	wash run 5
Raw.Average	0	6Li (STD)	Y [cps]	2853.67	2893.68	3007.04	2853.68	2826.99	2873.67	2873.68	3047.05	2833.66	189852	386488	747295	2.10131e+06	4.14173e+06	8.39526e+06	4094.03	3293.78	3040.38	509891	774607	2753.65	2820.33
Raw.Average	0	7Li (STD)	Y [cps]	37476.2	38151.8	38452.6	38800.3	39489.1	39275.1	40331.8	41228.1	36707.2	2.81359e+06	5.69723e+06	1.12804e+07	2.73559e+07	5.48219e+07	1.13211e+08	53775.6	40906.9	40498.9	7.09929e+06	1.06571e+07	34374	35784.6
Raw.Average	0	31P (KED)	Y [cps]	126.668	53.3337	53.3338	513.345	800.029	1713.45	4100.69	8115.99	16417.5	146.668	126.668	120.001	106.667	140.002	100.001	120.001	60.0003	106.668	4934.32	6181.56	106.668	126.668
Raw.Average	0	56Fe (KED)	Y [cps]	21598.7	15102.5	11438.6	22239.8	23882.8	21879.2	43214.7	35650.9	48393.8	643612	1.26963e+06	2.39726e+06	5.93072e+06	1.15517e+07	2.3229e+07	18173.3	11058.3	22667.3	1.37672e+07	1.76571e+07	20169.7	12693.2
Raw.Average	0	57Fe (KED)	Y [cps]	626.684	326.672	333.339	493.344	633.351	513.347	1013.38	1093.38	1320.07	16624.4	32402.1	62643.5	152526	293271	594030	433.343	273.337	640.018	354281	455185	473.344	253.337
Raw.Average	0	103Rh (KED)	Y [cps]	1.19615e+06	1.21403e+06	1.18442e+06	1.20656e+06	1.18988e+06	1.20236e+06	1.22002e+06	1.17866e+06	1.18577e+06	1.20828e+06	1.17879e+06	1.15456e+06	1.11422e+06	1.07451e+06	1.05556e+06	1.09882e+06	1.08147e+06	1.07109e+06	1.077e+06	1.06739e+06	990601	993613
Raw.Average	0	103Rh (STD)	Y [cps]	1.69635e+06	1.72752e+06	1.74615e+06	1.74316e+06	1.75562e+06	1.74911e+06	1.76782e+06	1.77903e+06	1.75248e+06	1.73076e+06	1.76158e+06	1.72499e+06	1.67169e+06	1.63385e+06	1.62456e+06	1.64703e+06	1.61539e+06	1.59979e+06	1.62572e+06	1.62825e+06	1.52691e+06	1.50719e+06
Raw.Average	0	139La (STD)	Y [cps]	2.19411e+06	2.18481e+06	2.19028e+06	2.22141e+06	2.22796e+06	2.14828e+06	2.24271e+06	2.24679e+06	2.20495e+06	2.21045e+06	2.22497e+06	2.23084e+06	2.19703e+06	2.15533e+06	2.13683e+06	2.14694e+06	2.09799e+06	2.06229e+06	2.12834e+06	2.08142e+06	1.96477e+06	1.95265e+06
Raw.Average	0	139La (KED)	Y [cps]	984621	997856	976216	986113	965621	986644	980534	965014	960414	970008	941430	938449	921958	880217	880462	886837	875922	868841	874083	865938	795734	794260
ExtCal.Average	0	6Li (STD)	Y [ppb]	-0.00420599	-0.00691867	0.0111247	N/A	N/A	N/A	N/A	N/A	N/A	42.0913	84.8377	168.16	489.204	987.197	2013.24	0.308689	0.134608	0.0803503	121.563	184.758	0.0437099	0.0699028
ExtCal.Average	0	7Li (STD)	Y [ppb]	0.000738858	0.000510735	-0.00124959	N/A	N/A	N/A	N/A	N/A	N/A	46.5347	93.2006	189.101	474.151	973.032	2021.46	0.307152	0.094505	0.0944277	126.07	189.286	0.0130932	0.0489239
ExtCal.Average	0	31P (KED)	Y [ppb]	5.98032	-3.08455	-2.89577	52.6058	88.5223	198.202	480.49	994.356	2008.39	N/A	N/A	N/A	N/A	N/A	N/A	6.58363	-1.35054	5.04483	658.689	835.021	6.24879	9.16774
ExtCal.Average	0	56Fe (KED)	Y [ppb]	0.427473	-0.086393	-0.34108	N/A	N/A	N/A	N/A	N/A	N/A	47.5319	97.3736	188.818	485.965	982.951	2013.34	0.289653	-0.289608	0.711355	1168.82	1512.84	0.638195	-0.0553092
ExtCal.Average	0	57Fe (KED)	Y [ppb]	0.591555	-0.320278	-0.271277	N/A	N/A	N/A	N/A	N/A	N/A	48.0128	97.2047	193.091	489.145	976.805	2015.19	0.13032	-0.378338	0.858107	1177.4	1526.48	0.427127	-0.37379
ExtCal.Average	0	103Rh (KED)	Y [%]	100	101.495	99.0195	100.871	99.4761	100.519	101.996	98.5381	99.132	101.014	98.5485	96.5229	93.1504	89.8308	88.2468	91.8636	90.4129	89.5447	90.0388	89.236	82.8159	83.0677
ExtCal.Average	0	103Rh (STD)	Y [%]	100	101.838	102.936	102.759	103.494	103.11	104.213	104.874	103.309	102.028	103.845	101.689	98.5466	96.3157	95.768	97.0928	95.2277	94.3081	95.8362	95.9858	90.0113	88.849
ExtCal.Average	0	139La (STD)	Y [%]	100	99.5764	99.8255	101.244	101.543	97.9112	102.215	102.401	100.494	100.745	101.406	101.674	100.133	98.2326	97.3896	97.8502	95.6191	93.9921	97.0024	94.8638	89.5476	88.9952
ExtCal.Average	0	139La (KED)	Y [%]	100	101.344	99.1463	100.152	98.0703	100.205	99.5849	98.0087	97.5415	98.5158	95.6134	95.3106	93.6358	89.3966	89.4214	90.0688	88.9603	88.2412	88.7735	87.9464	80.8163	80.6666
																					Mass%
ExtCal.LOD	0	6Li (STD)	Y [ppb]				0.0291877	0.0291877	0.0291877	0.0291877	0.0291877	0.0291877	0.0291877	0.0291877	0.0291877	0.0291877	0.0291877	0.0291877			Li	6.45328	7.46057
ExtCal.LOD	0	7Li (STD)	Y [ppb]				0.00326452	0.00326452	0.00326452	0.00326452	0.00326452	0.00326452	0.00326452	0.00326452	0.00326452	0.00326452	0.00326452	0.00326452			Fe	59.8297	59.6277
ExtCal.LOD	0	31P (KED)	Y [ppb]				15.5399	15.5399	15.5399	15.5399	15.5399	15.5399	15.5399	15.5399	15.5399	15.5399	15.5399	15.5399			P	33.717	32.9118
ExtCal.LOD	0	56Fe (KED)	Y [ppb]				1.17448	1.17448	1.17448	1.17448	1.17448	1.17448	1.17448	1.17448	1.17448	1.17448	1.17448	1.17448			Mole%
ExtCal.LOD	0	57Fe (KED)	Y [ppb]				1.53866	1.53866	1.53866	1.53866	1.53866	1.53866	1.53866	1.53866	1.53866	1.53866	1.53866	1.53866			Li	0.929734	1.07485
ExtCal.LOD	0	103Rh (KED)	Y [%]																		Fe	1.07135	1.06774
ExtCal.LOD	0	103Rh (STD)	Y [%]																		P	1.08951	1.06349
ExtCal.LOD	0	139La (STD)	Y [%]																Mole ratio compare to Fe
ExtCal.LOD	0	139La (KED)	Y [%]																		Li	0.867813	1.00667
																					Fe	1	1
																					P	1.01695	0.996022
																						Initial	1h
